# Supplementary material
Source: publisher figshare collection journal article supplement (https://gsapubs.figshare.com/ndownloader/files/23301629)
Supplement: Supplementary file 1 [file 23301629]

## Sheet: Sheet1
Lab Run ID	CO2 Laser	Measured Signals (x 10-13A)										Derived Results
	Power	40Ar		39Ar		38Ar		37Ar		36Ar		39Ar Mol	39Ar %	Ca/K		40Ar*/39Ar		%40Ar*	Age (Ma)
	(Watts)	±1s		±1s		±1s		±1s		±1s		¥ 10-14	of total	±1s		±1s			± 2s
	SMA02, whole rock, J = 0.0001062 ± 0.00000056
1409-01A	1.3	273869	52.3007	295.366	7.68087	179.496	4.4332	90.6941	3.79393	892.4	1.53915	0.00900606	7.97395	2.00847	0.0989292	25.2331	1.69809	2.72114	4.89876	0.658451
1409-01B	1.4	83412	28.5545	148.548	8.10904	52.7667	4.21951	68.412	3.99919	267.278	0.56937	0.00452938	4.01031	3.0133	0.241012	24.4237	1.76867	4.34808	4.74181	0.685878
1409-01C	1.5	28082.7	12.3434	55.6358	7.51192	44.2508	4.36088	34.1272	3.79391	89.2012	0.28485	0.0016964	1.50199	4.0147	0.702159	26.23	3.86763	5.19339	5.09201	1.49955
1409-01D	1.6	13759.6	8.96437	58.2685	5.17192	16.6658	4.21951	34.521	4.14208	43.1607	0.17525	0.00177667	1.57306	3.87871	0.578893	15.1214	1.62373	6.39991	2.93724	0.630292
1409-01E	1.7	13274.7	8.50412	35.1797	5.50025	13.8469	4.21951	29.3321	3.92948	41.4283	0.19243	0.00107267	0.94974	5.46033	1.12423	25.9433	4.38542	6.86862	5.03643	1.70036
1409-01F	1.8	8756.87	8.13449	48.6515	5.36581	23.8365	4.43319	36.894	3.79391	27.2057	0.13975	0.00148344	1.31344	4.96772	0.7491	13.212	1.70123	7.33411	2.56661	0.660509
1409-01G	1.9	12412	8.50412	62.7591	5.17192	20.533	4.65598	28.1308	4.14208	38.5089	0.17267	0.0019136	1.6943	2.9372	0.495612	14.6766	1.46938	7.41853	2.85091	0.570403
1409-01H	2	14431.4	6.71193	64.15	5.17193	17.0515	4.36088	37.4749	4.07007	44.2328	0.20303	0.00195601	1.73185	3.82917	0.517938	19.2302	1.8204	8.54338	3.73453	0.706329
1409-01I	2.5	64488.2	11.114	241.479	5.63852	62.8156	4.36088	158.456	4.07011	196.089	0.48977	0.00736298	6.51917	4.30251	0.149353	24.7635	0.839575	9.26652	4.80769	0.32557
1409-01J	3	26015.8	9.68349	172.014	7.09639	27.5554	4.21951	110.525	3.9992	74.0877	0.2481	0.00524491	4.64383	4.21422	0.231254	22.7937	1.03705	15.0611	4.42573	0.402232
1409-01K	3.5	206247	17.8986	702.352	5.63877	126.66	4.15056	208.918	3.92957	630.722	1.17911	0.0214155	18.9613	1.95152	0.0399104	25.6009	0.542506	8.71748	4.97005	0.210354
1409-01L	4	184300	17.8986	714.343	5.70923	127.105	4.36089	296.659	3.86122	558.865	1.04421	0.0217812	19.285	2.72541	0.041627	24.5099	0.479393	9.49744	4.75852	0.185904
1409-01M	4.5	84791.8	12.3434	471.453	5.50038	58.9186	4.36088	468.85	4.28967	245.862	0.57586	0.0143752	12.7277	6.52841	0.0967937	24.38	0.464986	13.5386	4.73333	0.180319
1409-01N	5	38432.7	10.0125	230.63	5.8524	35.5569	4.15055	341.006	4.21538	111.384	0.32725	0.00703219	6.22628	9.70932	0.27406	22.7907	0.721286	13.6481	4.42514	0.279758
1409-01O	6	29083.3	9.68349	200.676	7.51193	19.6527	4.15055	776.724	4.07126	81.2806	0.27926	0.00611886	5.41762	25.4239	0.960982	24.9128	1.03657	17.0848	4.83664	0.401956
1409-01P	7	8164.34	6.76757	126.571	5.78025	25.5674	4.36088	597.876	4.14277	22.1797	0.13761	0.00385931	3.41703	31.0369	1.43361	13.22	0.698214	20.3398	2.56816	0.271084
1409-01Q	8	1911.35	7.77946	35.8155	5.30011	9.6335	4.21951	248.451	4.36444	5.17912	0.08306	0.00109206	0.966905	45.5935	6.79446	11.698	1.90275	21.6719	2.27267	0.738871
1409-01R	10	2715.54	7.8492	40.2465	5.43254	11.8094	4.28964	324.642	4.14228	7.78773	0.08807	0.00122717	1.08653	53.0321	7.19027	11.4481	1.71722	16.7424	2.22416	0.666842
Plateau age = 4.78 ± 0.13 Ma, steps 2.5-4.5 watts, 62.2% of 39Ar, MSWD = 1.7, integrated age = 4.4 ± 0.4 Ma
SMA03, whole rock, J = 0.0001062 ± 0.00000056	SMA03, whole rock, J = 0.0001062 ± 0.00000056
1410-01A	1.3	23290.5	9.12634	854.893	7.1238	15.2415	4.36397	289.382	4.42029	20.9381	0.1268	0.0260668	20.5887	2.25576	0.0392504	20.0017	0.173126	73.4072	3.8842	0.0671686
1410-01B	1.4	16821.3	7.86448	619.097	5.42822	19.5143	4.5709	207.323	4.14868	13.2157	0.10183	0.0188771	14.9099	2.2323	0.0487698	20.8677	0.190211	76.7914	4.05218	0.0737902
1410-01C	1.5	12041.3	7.71557	410.741	5.71162	15.5184	4.64205	143.51	4.35053	11.2798	0.10499	0.0125241	9.89202	2.32973	0.0777023	21.1908	0.305323	72.2724	4.11485	0.118443
1410-01D	1.6	10146.1	7.78974	318.952	5.78455	13.2733	4.43182	111.834	4.35052	11.0091	0.09379	0.00972528	7.68143	2.33869	0.10038	21.5799	0.402227	67.8271	4.19032	0.156028
1410-01E	1.7	8316.09	6.56049	234.833	5.71154	9.35656	4.50081	87.0411	4.14861	10.5429	0.08725	0.00716037	5.65556	2.47297	0.132328	22.088	0.54974	62.3604	4.28887	0.213238
1410-01F	1.8	7475.51	6.5	205.544	5.71153	10.8599	4.50081	80.769	4.21468	10.9778	0.09286	0.00626733	4.9502	2.62255	0.155043	20.5081	0.586981	56.375	3.98243	0.227722
1410-01G	1.9	6863.47	6.21289	169.987	5.78451	-15.5382	4.36397	74.8908	3.95846	11.5429	0.09487	0.00518314	4.09386	2.94121	0.184894	20.1929	0.708659	49.9956	3.92129	0.274936
1410-01H	2	5989.28	6.26817	144.862	5.71152	-6.02341	4.43182	59.2647	4.3505	10.5688	0.09183	0.00441703	3.48875	2.73204	0.227651	19.6469	0.799252	47.507	3.81538	0.310102
1410-01I	2.5	11718.8	8.16884	291.233	5.71156	9.76208	4.36397	115.763	4.21469	23.1903	0.14632	0.00888011	7.01387	2.65523	0.109805	16.5487	0.358985	41.1163	3.21424	0.139328
1410-01J	3	12188.3	7.86448	269.277	5.78453	-5.20249	4.64204	130.837	4.28202	25.9483	0.13814	0.00821063	6.4851	3.24667	0.127101	16.5947	0.389571	36.6484	3.22317	0.151199
1410-01K	3.5	6918.56	6.5	145.795	5.7845	3.3826	4.43182	98.5317	4.42015	16.4388	0.11586	0.00444551	3.51124	4.51719	0.270526	13.9353	0.604153	29.3448	2.70702	0.234547
1410-01L	4	9756.3	7.64199	162.039	5.42798	24.9937	4.29734	123.797	4.35053	24.5564	0.14684	0.0049408	3.90244	5.10809	0.247998	15.1343	0.577546	25.114	2.93974	0.224189
1410-01M	4.5	4441.34	6.00333	55.0297	5.22506	47.673	4.23196	56.8426	4.49086	11.2901	0.10313	0.00167793	1.3253	6.90835	0.853321	19.7181	1.96084	24.3987	3.82919	0.760779
1410-01O	6	8190.49	6.26817	98.7237	5.71151	-4.11451	4.36397	191.52	4.49092	21.4034	0.12698	0.00301022	2.3776	12.9823	0.810418	18.6748	1.15329	22.4441	3.62677	0.447509
1410-01P	7	5746.35	6.21289	41.5381	5.56799	-9.99945	4.50081	211.587	4.14868	15.1175	0.10614	0.00126655	1.00038	34.0981	4.61935	30.9468	4.26323	22.1834	6.00617	1.65211
1410-01Q	8	2947.4	6.38201	24.291	5.15947	-5.96407	4.64204	73.66	4.282	7.59142	0.0865	0.000740666	0.585008	20.3051	4.47147	28.7646	6.24097	23.5927	5.58331	2.4191
1410-01R	10	13077.8	8.24621	105.41	5.71151	27.318	4.43182	469.333	4.08426	35.5626	0.16113	0.0032141	2.53862	29.8228	1.63662	24.415	1.41999	19.5365	4.74013	0.550664
Plateau age = 4.08 ± 0.07 Ma, steps 1.4-2.0 watts, 50.7% of 39Ar, MSWD = 2.0, integrated age = 3.84 ± 0.19 Ma
SMA08, whole rock, J = 0.0001062 ± 0.00000056	SMA08, whole rock, J = 0.0001062 ± 0.00000056
1411-01A	1.3	7133.44	8.20366	347.455	7.29057	-17.2691	4.78211	52.9041	4.14208	4.70681	0.07193	0.0105944	5.02403	1.02068	0.0827334	16.5112	0.352838	80.4371	3.20697	0.136943
1411-01B	1.4	9718.57	8.20366	434.933	6.39406	-6.07286	4.64514	74.9597	3.99919	5.319	0.07747	0.0132617	6.2889	1.15568	0.0639548	18.7246	0.281127	83.8096	3.63644	0.109085
1411-01C	1.5	13924.8	8.5703	581.682	7.97351	10.8006	4.51268	73.2858	3.86105	7.30761	0.09074	0.0177363	8.41082	0.845075	0.0460049	20.2089	0.281381	84.4379	3.9244	0.109166
1411-01D	1.6	13167	8.34865	585.467	5.49773	13.6095	4.64514	86.5094	3.86105	6.94568	0.08144	0.0178517	8.46556	0.991407	0.0452168	18.9743	0.183598	84.384	3.68488	0.0712394
1411-01E	1.7	13440.4	8.72067	560.779	5.35953	-2.9672	4.71308	74.1425	4.14209	7.21762	0.08241	0.0170989	8.10857	0.887354	0.0502937	20.1462	0.198177	84.0746	3.91224	0.0768864
1411-01F	1.8	13504.8	8.34865	557.431	5.49771	20.355	4.64514	60.3971	4.07007	7.56133	0.07613	0.0169969	8.06016	0.727406	0.049541	20.1944	0.20392	83.3767	3.92158	0.0791142
1411-01G	1.9	13243.4	8.87299	540.839	5.42814	11.216	4.44827	48.4338	4.14208	7.51401	0.07793	0.016491	7.82026	0.601398	0.0517848	20.3511	0.209434	83.1346	3.95198	0.0812522
1411-01H	2	12426.2	8.5703	497.086	5.63947	18.2087	4.51268	76.2693	3.99919	7.1409	0.07784	0.0151569	7.18761	1.03069	0.0552951	20.7371	0.240594	82.9693	4.02685	0.0933372
1411-01I	2.5	22425.9	8.79659	878.27	5.78493	21.8287	4.64514	109.569	4.07009	13.7867	0.11479	0.0267797	12.6993	0.838306	0.0316257	20.8682	0.143312	81.745	4.05228	0.0555964
1411-01J	3	19220.3	9.10494	751.411	5.42831	11.1072	4.71308	123.827	4.21519	12.8451	0.10423	0.0229116	10.865	1.10767	0.0385458	20.505	0.154403	80.1763	3.98184	0.0599014
1411-01K	3.5	8162.15	8.20366	345.15	5.56806	4.32222	4.51268	65.9799	3.99919	6.08076	0.0758	0.0105241	4.9907	1.2853	0.0806172	18.4244	0.305453	77.9194	3.57821	0.118528
1411-01L	4	4051.48	6.6888	203.438	5.63935	-1.66163	4.32336	70.7652	3.79392	3.86397	0.06556	0.00620312	2.94161	2.33948	0.1412	14.3158	0.409984	71.8726	2.78087	0.159159
1411-01M	4.5	4758.66	6.48845	326.751	5.9328	-0.62311	4.71308	305.619	3.92967	5.14506	0.07927	0.00996311	4.72465	6.29254	0.140001	10.0619	0.198307	69.0077	1.95498	0.0770192
1411-01N	5	2555.23	7.85175	148.706	5.85825	5.94428	4.38514	337.462	3.86127	3.3779	0.06025	0.00453428	2.15022	15.2718	0.626493	10.897	0.452261	63.1955	2.11715	0.175636
1411-01O	6	976.41	7.92086	43.2667	5.42796	-7.57624	4.38514	269.128	3.79406	1.70519	0.05	0.00131927	0.625615	41.8728	5.28615	12.1719	1.59703	53.378	2.36469	0.620123
1411-01P	7	931.44	7.92086	47.9958	5.22505	-12.3831	4.71308	338.653	3.99941	1.54749	0.04999	0.00146346	0.693995	47.5126	5.20279	11.3251	1.3031	57.6677	2.20027	0.506035
1411-01Q	8	1067.78	7.58222	31.2951	5.42796	2.10671	4.44827	383.286	4.07036	2.03207	0.05497	0.000954234	0.452511	82.4961	14.3353	17.5688	3.18301	50.4194	3.41219	1.23525
1411-01R	10	905.49	7.92086	33.9179	5.49753	2.19573	4.64514	435.59	4.14245	1.63045	0.05577	0.00103421	0.490436	86.5296	14.0491	15.2686	2.60617	55.9429	2.96581	1.01164
Weighted mean age* = 3.98 ± 0.05 Ma, steps 1.7-3.0 watts, 54.8% of 39Ar, MSWD = 2.7, integrated age = 3.7 ± 0.3 Ma
SMA09, whole rock, J = 0.0001062 ± 0.00000056
1412-01A	1.3	29017.2	8.46286	182.664	5.49755	22.5606	4.15223	50.472	4.27982	82.0651	0.26167	0.0055697	3.86391	1.86338	0.167664	24.78	0.861374	15.5984	4.81089	0.334022
1412-01B	1.4	7155.76	7.66942	96.4982	5.71151	0.25716	3.8693	22.804	4.21016	14.5558	0.10546	0.00294238	2.04124	1.59414	0.30907	29.1648	1.75934	39.3311	5.66086	0.681919
1412-01C	1.5	9878.51	7.74661	142.398	5.71152	1.93857	4.22579	35.3088	4.07441	21.5832	0.12666	0.00434192	3.01215	1.67318	0.204406	24.1688	1.00707	34.8394	4.69238	0.390546
1412-01D	1.6	19891	8.2201	163.45	7.54403	-13.7282	4.07974	31.1044	4.21016	52.5082	0.1977	0.00498383	3.45747	1.28449	0.183694	25.8119	1.24631	21.2128	5.01096	0.483241
1412-01E	1.7	29546.4	8.54459	240.635	5.56803	27.1004	3.8693	61.0568	4.14168	79.9456	0.26884	0.00733731	5.09017	1.71317	0.122785	23.6479	0.642105	19.2596	4.59138	0.249025
1412-01F	1.8	31589.4	8.70919	259.282	5.85828	33.1139	4.30037	47.2425	4.21016	86.116	0.27325	0.00790591	5.48463	1.23059	0.113138	22.7084	0.602979	18.6412	4.4092	0.233874
1412-01G	1.9	23984	8.0604	218.201	5.22509	3.90681	4.37591	49.8517	4.00845	62.5631	0.23973	0.00665329	4.61564	1.5435	0.129496	24.3562	0.670438	22.1598	4.72873	0.259993
1412-01H	2	22237.9	8.3006	212.052	5.71153	11.394	4.22579	38.4694	4.35059	57.8113	0.21887	0.00646578	4.48555	1.226	0.142529	23.5076	0.70548	22.4188	4.56418	0.273607
1412-01I	2.5	86023.5	12.042	822.535	5.4284	34.9536	4.15223	198.373	4.2799	227.72	0.72311	0.0250803	17.3992	1.63032	0.036783	21.974	0.300346	21.0114	4.26675	0.116502
1412-01J	3	39388	9.89798	548.678	5.42816	16.5372	3.93821	159.52	4.07447	91.6844	0.4211	0.01673	11.6062	1.96595	0.0538496	21.9573	0.316472	30.5847	4.26351	0.122758
1412-01K	3.5	42571.6	9.72471	538.475	5.29188	29.9687	4.15223	294.167	4.14185	105.839	0.46558	0.0164189	11.3904	3.69517	0.0634478	20.4981	0.328526	25.9141	3.98049	0.127453
1412-01L	4	52714.1	9.72471	677.057	7.45937	25.5476	4.07974	427.358	4.14204	133.741	0.50899	0.0206445	14.3219	4.27073	0.0626678	19.0219	0.308124	24.4156	3.69412	0.119557
1412-01M	4.5	23296.3	8.95879	298.714	5.22511	6.91357	4.07974	255.757	4.27995	58.7003	0.20173	0.00910826	6.31873	5.79478	0.140278	19.5113	0.398755	24.9919	3.78907	0.154715
1412-01N	5	10779.2	7.51665	125.27	5.42797	0.12858	4.00838	122.448	4.1417	28.9236	0.15768	0.00381967	2.64985	6.61762	0.363763	17.3308	0.843611	20.1155	3.366	0.327393
1412-01O	5.98636	7788.04	6.20081	94.4318	5.78449	-4.96511	4.07974	173.688	4.27988	20.3061	0.13552	0.00287937	1.99752	12.456	0.822423	18.6922	1.22916	22.602	3.63015	0.476948
1412-01P	7	5796.89	6.02163	51.7413	5.49753	8.19935	4.00838	196.522	4.21024	16.3849	0.17257	0.00157767	1.09449	25.7294	2.78878	18.3776	2.21162	16.3018	3.56912	0.8582
1412-01R	10	9169.95	8.14002	55.3576	5.35934	-4.29255	4.07974	491.585	4.00895	25.1816	0.14677	0.00168794	1.17098	60.1919	5.84801	32.1153	3.28553	19.0953	6.23259	1.27307
Integrated age = 4.13 ± 0.19 Ma, no age plateau
SMA10, whole rock, J = 0.0001062 ± 0.00000056
1413-01A	1.3	34429.2	9.04434	436.214	5.49854	9.65328	4.36088	205.265	4.06991	71.4367	0.25471	0.0133008	15.2127	3.19215	0.0749999	30.1397	0.419279	38.1722	5.84979	0.162495
1413-01B	1.4	16310.1	8.09197	338.981	5.64377	2.29463	4.36088	152.667	4.0014	18.42	0.12639	0.010336	11.8218	3.05609	0.0948946	31.9934	0.545478	66.4706	6.20897	0.211363
1413-01C	1.5	13276.3	7.86448	275.139	5.35661	-13.1447	4.15055	145.725	3.9342	13.7447	0.10631	0.00838941	9.59532	3.59509	0.119663	33.4593	0.663219	69.308	6.49295	0.256946
1413-01D	1.6	8380.25	7.86448	167.96	7.49282	1.54294	4.36088	85.1408	4.21034	8.81322	0.08843	0.00512137	5.85753	3.44182	0.229225	34.3458	1.54252	68.8068	6.66466	0.597549
1413-01E	1.7	6550.31	6.21289	128.489	5.35657	-9.18842	4.43319	65.0248	4.00136	7.93939	0.11424	0.00391782	4.48098	3.43718	0.255478	32.645	1.38886	64.0072	6.3352	0.538122
1413-01F	1.77652	5900.15	6.32456	124.326	5.49842	-9.56427	4.28964	54.2825	4.06983	7.12367	0.11411	0.0037909	4.33581	2.96631	0.258208	30.4447	1.37618	64.1317	5.9089	0.533333
1413-01G	1.9	6138.97	6.32456	100.015	5.42705	-0.96928	4.36088	60.5349	4.00136	8.28122	0.08739	0.00304962	3.48798	4.11328	0.351766	36.804	2.01742	59.9236	7.14073	0.781319
1413-01H	2	5145.95	6.26817	88.2125	5.28702	-2.84851	4.21951	35.3186	4.21033	7.72715	0.08364	0.00268974	3.07636	2.72177	0.363162	32.2702	1.95752	55.3039	6.2626	0.758481
1413-01I	2.5	12121.2	7.71557	205.852	5.28704	4.7673	4.43319	80.257	4.00137	20.8434	0.12728	0.00627676	7.17899	2.65116	0.148686	28.7385	0.762448	48.7944	5.57825	0.295537
1413-01J	3	9785.35	7.64199	190.821	5.28704	-0.87038	4.21951	84.4318	4.13951	15.3808	0.11608	0.00581843	6.65477	3.00967	0.16949	27.3131	0.780068	53.2448	5.30198	0.302413
1413-01K	3.5	4094.2	6.10574	94.3821	5.42705	-19.1978	4.36088	69.7117	4.00136	5.23129	0.06979	0.00287786	3.29153	5.02556	0.408308	26.9955	1.57153	62.1788	5.2404	0.609264
1413-01L	4	1844.82	7.35391	48.2541	5.42704	-14.5887	4.28964	85.3279	4.13951	1.68618	0.05822	0.00147134	1.68284	12.0353	1.47414	28.2213	3.20878	73.6211	5.47801	1.24384
1413-01M	4.5	7207.61	7.86448	87.06	5.42705	-1.47371	4.5065	184.027	4.06989	15.7204	0.11619	0.0026546	3.03617	14.391	0.951876	29.4022	1.88673	35.3987	5.70687	0.731275
1413-01N	5	6639.08	7.42496	77.6814	5.49842	-1.03852	4.28964	246.748	4.00148	13.5549	0.09709	0.00236863	2.7091	21.6319	1.57082	34.1891	2.46861	39.7981	6.63431	0.956322
1413-01O	6	7177.65	8.09197	167.782	5.71756	-14.1733	4.21951	486.485	4.00184	10.8328	0.09351	0.00511593	5.85129	19.7522	0.692435	24.2024	0.852485	56.3116	4.6989	0.330596
1413-01P	7	4095.12	6.05392	118.534	5.57065	-12.1062	4.21951	680.929	4.14042	4.24074	0.06701	0.00361429	4.13381	39.1452	1.85501	25.2768	1.22944	72.4585	4.90722	0.476723
1413-01Q	8	4497.1	8.09197	131.052	5.57065	-9.98956	4.21951	1069.83	4.07214	4.29569	0.10431	0.00399599	4.57037	55.6442	2.37474	26.5591	1.20954	76.3216	5.15582	0.468947
1413-01R	10	3668.91	6.15873	86.6726	5.42705	-8.85214	4.43319	516.762	4.28276	4.40517	0.07051	0.00264279	3.02266	40.6527	2.56769	28.6551	1.84614	67.0144	5.56209	0.7156
Integrated age = 5.8 ± 0.3 Ma, no age plateau
SMA11, whole rock, J = 0.0001031 ± 0.00000029
1421-01A	1.3	93951.2	11.2712	1111.33	7.06468	66.5542	4.57832	190.358	4.00851	198.228	0.65834	0.033887	25.1752	1.23464	0.0271575	31.3178	0.26664	37.0509	5.9004	0.10031
1421-01B	1.4	63069.4	11.2712	911.055	8.99224	42.1045	4.64514	163.95	4.07446	112.01	0.46895	0.0277801	20.6383	1.29751	0.0346955	32.5552	0.356593	47.0331	6.13314	0.134134
1421-01C	1.5	27736.6	8.48116	370.991	6.94863	7.08171	4.57832	89.3747	4.14168	52.2317	0.30909	0.0113123	8.40412	1.7375	0.0868448	32.7799	0.6632	43.8456	6.17539	0.249459
1421-01D	1.6	19593.6	8.24621	246.129	7.24416	13.9359	4.44827	64.6408	4.35059	38.4318	0.16266	0.00750501	5.57559	1.89473	0.139184	33.0465	0.993586	41.511	6.22554	0.373722
1421-01E	1.7	18507.2	7.78974	240.307	6.67694	10.8402	4.51268	74.8809	4.07442	38.1427	0.17159	0.00732749	5.4437	2.24874	0.137388	29.6966	0.853434	38.5552	5.59542	0.321116
1421-01F	1.8	17584.8	8.88144	193.811	7.18326	24.2519	4.57832	57.3152	4.14167	38.3694	0.17171	0.00590973	4.39043	2.13479	0.173371	31.6943	1.20572	34.9289	5.97121	0.453575
1421-01G	1.9	14910.9	8.24621	118.653	8.24762	17.3977	4.57832	52.7957	4.21016	34.4116	0.16053	0.003618	2.68787	3.21303	0.339896	39.1931	2.75741	31.1766	7.38114	1.0365
1421-01H	2	14054.3	7.64199	144.047	8.76345	-3.2837	4.57832	52.008	4.27982	32.7772	0.16897	0.00439231	3.26311	2.6079	0.266888	29.7126	1.84333	30.4471	5.59842	0.693579
1421-01I	2.5	26822.8	9.62549	255.497	8.83917	21.2847	4.64514	80.8576	4.00845	63.9042	0.23177	0.00779068	5.78782	2.2866	0.13823	30.3809	1.08676	28.9354	5.72415	0.408881
1421-01J	3	5590.95	6.4405	60.5933	6.78252	14.4997	4.71308	49.1822	4.35059	12.8847	0.10357	0.00184763	1.37263	5.86635	0.836946	28.9969	3.29259	31.3933	5.46378	1.23897
1421-01K	3.5	10840.3	7.56902	80.3241	6.62572	7.18062	4.44827	133.565	4.07444	28.6749	0.15786	0.00244926	1.81959	12.0216	1.05726	28.8105	2.45827	21.2917	5.42871	0.925044
1421-01L	4	7936.66	7.93977	41.2201	6.78251	-3.97604	4.57832	108.693	4.21018	21.1968	0.1362	0.0012569	0.933766	19.0694	3.22352	39.7527	6.65231	20.5543	7.48632	2.50044
1421-01M	4.5	9646.92	7.64199	99.7072	6.89223	10.6522	4.64514	148.344	4.35062	23.0173	0.12764	0.0030403	2.25868	10.7626	0.808153	28.2193	1.9957	29.0992	5.31747	0.751025
1421-01N	5	25962.2	9.20869	284.706	7.0059	28.1093	4.51268	528.844	4.21069	60.0869	0.33128	0.00868133	6.44949	13.4411	0.347635	28.6684	0.793439	31.3441	5.40198	0.298574
1421-01O	6	13310.2	8.40238	184.591	7.00587	-3.52107	4.57832	576.884	4.3512	27.4384	0.15734	0.00562861	4.18158	22.621	0.875332	28.5549	1.12812	39.3886	5.38061	0.42452
1421-01P	7	2397.5	7.49667	33.6994	6.43221	8.09056	4.71308	144.858	4.2102	4.71067	0.07774	0.00102757	0.763397	31.1234	6.00901	30.5796	5.93221	42.6581	5.76154	2.23187
1421-01R	10	1850.56	6.94262	37.733	6.72919	6.21133	4.44827	153.828	4.2102	3.45561	0.06594	0.00115056	0.85477	29.5353	5.3289	22.7527	4.12898	46.0614	4.28859	1.55469
Plateau age = 6.01 ± 0.14 Ma, steps 1.3-1.6 watts, 59.8% of 39Ar, MSWD = 3.7, integrated age = 5.93 ± 0.13 Ma
SMA18, whole rock, J = 0.0001031 ± 0.00000029
1422-01A	1.3	43335.8	9.67988	361.007	5.63941	30.9479	4.2234	95.0264	4.42015	121.372	0.31839	0.0110079	15.7366	1.90871	0.0936568	19.722	0.406378	16.4289	3.71791	0.153062
1422-01B	1.4	16023.6	8.30963	330.417	5.29176	11.1962	4.36016	66.9842	4.3505	32.4947	0.15002	0.0100752	14.4032	1.47046	0.0983642	19.1758	0.33681	39.5453	3.61506	0.126867
1422-01C	1.5	13166.5	7.56637	261.727	5.42801	3.65954	4.36016	61.3029	4.21467	27.8221	0.1478	0.00798064	11.4089	1.69944	0.122039	18.6183	0.422553	37.0109	3.51005	0.159173
1422-01D	1.6	13875.2	6.58027	212.807	7.71481	6.02341	4.57368	59.0777	4.21467	31.9651	0.15896	0.00648896	9.27646	2.01484	0.161235	20.4158	0.774065	31.3106	3.84857	0.291531
1422-01E	1.7	12494.4	8.30963	173.842	5.7845	17.3779	4.2234	41.0984	4.21467	30.7157	0.15838	0.00530084	7.57794	1.71633	0.185045	19.1734	0.695528	26.6777	3.6146	0.261985
1422-01F	1.8	12467.6	8.08084	125.161	5.93275	8.59498	4.29118	35.2694	4.5626	32.559	0.14096	0.00381643	5.45588	2.04641	0.281944	22.0087	1.09862	22.093	4.14851	0.413698
1422-01G	1.9	14273.3	8.46463	133.595	5.63934	13.7084	4.36016	34.2158	4.21467	39.6421	0.16296	0.00407363	5.82356	1.86049	0.242257	18.3048	0.856977	17.1327	3.451	0.322828
1422-01H	2	14488.5	7.85684	103.333	5.35934	15.8844	4.50146	34.5112	4.14859	41.7537	0.19147	0.00315088	4.50441	2.42685	0.317726	19.6508	1.16285	14.013	3.70452	0.43799
1422-01I	2.5	53329.1	10.7912	243.953	5.78452	33.2623	4.36016	87.494	4.14861	158.279	0.59627	0.00743868	10.6342	2.60691	0.138203	24.979	0.941382	11.4243	4.70768	0.35438
1422-01J	3	31675.8	8.94036	146.61	5.63934	33.1733	4.36016	66.1473	4.3505	97.5244	0.33346	0.00447048	6.39089	3.28044	0.249943	17.5619	0.960493	8.12542	3.31108	0.36185
1422-01K	3.5	3419.07	6.19112	28.3345	5.49753	4.84642	4.29118	48.936	4.3505	10.2444	0.09667	0.000863984	1.23513	12.5611	2.68079	13.1389	2.76321	10.8584	2.47775	1.04147
1422-01L	4	1050.46	7.28629	27.947	5.29169	7.50701	4.50146	74.556	4.08383	2.69335	0.06054	0.00085217	1.21824	19.4085	3.82562	9.44722	1.93024	25.02	1.7819	0.727796
1422-01P	7	11150.8	8.00562	16.502	5.42796	3.55075	4.29118	108.211	4.21469	35.6279	0.16077	0.000503183	0.719337	47.7645	15.8209	32.943	11.3743	4.81746	6.20607	4.27833
1422-01Q	8	14297	8.08084	26.3376	5.49753	14.9052	4.29118	157.678	4.21471	45.6165	0.20267	0.000803094	1.14808	43.6212	9.17955	27.3438	6.23475	4.98292	5.15273	2.34648
1422-01R	10	64775.4	11.1414	102.479	5.85825	45.7542	4.15686	516.999	4.28249	207.891	0.50027	0.00312483	4.46717	36.7693	2.12388	27.7727	2.1878	4.35425	5.23345	0.823354
Plateau age = 3.63 ± 0.09 Ma, steps 1.3-1.7 watts, 58.4% of 39Ar, MSWD = 1.5, integrated age = 3.66 ± 0.09 Ma
SMA28, whole rock, J = 0.0001031 ± 0.00000029
1423-01A	1.3	23058.9	8.26196	346.621	8.40713	29.1972	4.45237	178.74	3.71861	56.9171	0.19217	0.0105693	20.7653	3.76171	0.120205	17.6224	0.459607	26.4768	3.32247	0.173148
1423-01B	1.4	4781.45	6.5437	183.876	9.18151	3.97604	4.45237	104.036	3.78959	4.96341	0.06753	0.00560682	11.0156	4.12866	0.255182	18.0789	0.911196	69.4834	3.40846	0.34326
1423-01C	1.5	4240.91	6.18547	195.649	6.72778	-5.31128	4.22579	68.2052	3.93516	3.69924	0.06299	0.0059658	11.7209	2.54461	0.170912	16.1084	0.56355	74.3005	3.03727	0.21234
1423-01D	1.6	3729.17	6.2426	180.061	8.63471	-8.10045	4.30037	63.3116	4.0096	2.76186	0.062	0.00549049	10.7871	2.56729	0.203942	16.2086	0.78541	78.2474	3.05613	0.295932
1423-01E	1.7	2997.01	6.2426	142.01	8.6347	1.50338	4.30037	44.0621	3.93516	2.10156	0.05771	0.00433023	8.50752	2.26615	0.244841	16.7554	1.0276	79.3846	3.15914	0.387164
1423-01F	1.8	2734.41	7.64853	121.057	6.67105	10.8303	4.15223	58.1029	4.08505	1.85655	0.05043	0.00369133	7.25229	3.50654	0.313239	18.1247	1.00953	80.2065	3.41708	0.380302
1423-01G	1.9	2318.33	7.5743	91.9878	6.61533	-1.23633	4.00838	42.1618	3.78957	1.37534	0.05195	0.00280492	5.51078	3.34959	0.385575	20.8459	1.51227	82.6811	3.92957	0.569532
1423-01H	2	1862.04	6.07454	75.1778	6.78547	-16.557	4.30037	37.3666	3.93515	1.05984	0.05192	0.00229235	4.50374	3.63352	0.503964	20.6683	1.8805	83.4071	3.89612	0.708222
1423-01I	2.5	3233.05	6.2426	123.323	8.3322	1.00885	4.15223	52.9631	3.93516	3.15596	0.06291	0.0037604	7.38799	3.14047	0.315385	18.6756	1.27311	71.2128	3.52085	0.479567
1423-01J	3	2298.52	7.50067	86.0864	6.67104	-23.3914	4.15223	49.9206	3.78957	2.97311	0.06118	0.00262498	5.15725	4.24169	0.460134	16.5144	1.3017	61.813	3.11375	0.490449
1423-01K	3.5	1809.97	6.93542	66.3158	6.56064	-3.33315	4.15223	74.9006	3.78958	2.78275	0.06201	0.00202213	3.97284	8.26404	0.918276	15.0343	1.52047	54.9931	2.83489	0.57296
1423-01L	4	1839.31	6.93542	23.2081	6.50701	-7.07182	4.15223	97.9016	4.16148	3.49264	0.05957	0.000707669	1.39034	30.8749	8.75552	35.4975	10.0693	44.4548	6.68644	3.78647
1423-01M	4.5	2939.49	6.07454	33.8583	7.68322	2.83862	4.37591	215.289	3.93524	7.10872	0.08221	0.00103242	2.02838	46.5522	10.598	25.8248	5.98441	29.4032	4.86687	2.25261
Plateau age = 3.22 ± 0.13 Ma, steps 1.3-1.8 watts, 70.1% of 39Ar, MSWD = 1.6, integrated age = 3.26 ± 0.14 Ma
SMA29, whole rock, J = 0.0001031 ± 0.00000029
1424-01A	1.09283	20028.2	8.70919	315.703	5.663	-45.9916	3.93821	35.0232	4.16024	50.5438	0.21436	0.00962656	12.3892	0.815899	0.0980156	15.6535	0.347466	24.6809	2.95155	0.130928
1424-01B	1.2	7300.73	7.51665	282.858	5.43622	-40.1561	4.07974	25.0588	4.56046	9.59637	0.08691	0.00862503	11.1002	0.651748	0.119272	15.6897	0.316383	60.8064	2.95838	0.119215
1424-01C	1.3	4329.86	5.85235	208.823	5.51104	-27.1696	4.37591	6.00623	4.42231	4.0284	0.07468	0.00636752	8.19486	0.211662	0.155944	14.9692	0.410244	72.2247	2.82263	0.154594
1424-01D	1.4	3625.34	5.69386	173.276	5.36216	-43.7068	4.22579	12.8592	4.42231	3.20179	0.06369	0.0052836	6.79988	0.546296	0.188631	15.406	0.490439	73.6583	2.90492	0.184806
1424-01E	1.5	3231.64	6.0803	150.614	5.51103	-32.0754	4.22579	19.6138	4.35493	2.40884	0.05483	0.00459259	5.91056	0.958905	0.215782	16.6971	0.622071	77.8361	3.14816	0.234376
1424-01F	1.6	2676.76	5.85235	148.269	7.91937	-36.4471	4.22579	2.39265	4.22384	1.93684	0.05477	0.00452109	5.81855	0.11886	0.209925	14.14	0.764356	78.3582	2.66639	0.28806
1424-01G	1.7	2354.74	5.96406	119.975	5.28894	-38.9395	4.30037	12.1109	4.28876	1.75795	0.0522	0.00365832	4.70817	0.743751	0.265412	15.2565	0.687	77.7541	2.87676	0.258878
1424-01H	1.8	2142.27	6.02163	120.819	5.36215	-46.13	4.22579	5.4253	4.42231	1.89338	0.0565	0.00368407	4.74131	0.330946	0.270163	13.0412	0.597599	73.5779	2.45932	0.22524
1424-01I	1.9	1848.75	5.79828	87.3978	5.36214	-52.6282	4.22579	9.04873	4.16024	1.70014	0.04562	0.00266497	3.42976	0.763285	0.354038	15.339	0.956504	72.5336	2.8923	0.36043
1424-01J	2	1789.13	5.96406	81.4468	5.58662	-42.8265	4.22579	7.33548	4.35493	2.46873	0.05656	0.00248351	3.19623	0.664178	0.396933	12.9111	0.912757	58.7933	2.43481	0.344031
1424-01K	2.5	3433.46	6.02163	151.737	5.36215	-49.1763	4.22579	24.9702	4.35493	5.06903	0.06758	0.00462682	5.95462	1.21392	0.216018	12.6742	0.469103	56.0208	2.39016	0.176816
1424-01L	3	3376.52	5.96406	135.87	5.51102	-36.6943	4.07974	57.7484	4.16025	5.72092	0.06681	0.00414303	5.33198	3.13622	0.259286	12.3661	0.525006	49.7445	2.3321	0.197893
1424-01M	3.5	2450.43	5.96406	104.436	5.28894	-53.5282	4.15223	94.1797	4.09804	4.10651	0.06562	0.00318452	4.09841	6.65622	0.444428	11.9162	0.635896	50.7232	2.24729	0.239703
1424-01N	4	1921.24	5.90762	50.4398	5.07464	-37.357	4.30037	113.213	4.42234	3.52976	0.06463	0.00153803	1.97941	16.572	1.78853	17.7287	1.83692	46.3677	3.34249	0.692017
1424-01O	5	3454.13	5.90762	101.754	5.51102	-34.2118	4.30037	335.138	4.35515	6.76779	0.08161	0.00310273	3.99314	24.3252	1.35485	14.8877	0.851723	43.6028	2.80727	0.320961
1424-01P	6	1311.68	5.85235	38.498	5.14514	-45.3388	4.15223	181.703	4.28882	2.70286	0.06097	0.0011739	1.51078	34.8689	4.73225	14.2257	1.98565	41.3971	2.68253	0.748319
1424-01Q	8	2915.43	6.7897	86.5037	5.28893	-36.0317	4.22579	459.939	4.63151	6.28647	0.06963	0.00263771	3.39467	39.2925	2.43475	13.2916	0.866611	39.0567	2.50651	0.326625
1424-01R	10	6761.79	7.29178	189.797	5.28895	-29.0291	4.07974	1291.05	4.22711	14.8255	0.11458	0.00578739	7.44824	50.2837	1.41086	13.9767	0.459978	38.7415	2.63562	0.173353
Plateau age = 2.92 ± 0.08 Ma, steps 1.1-1.7 watts, 55.0% of 39Ar, MSWD = 1.5, integrated age = 2.75 ± 0.12 Ma
SMA30, whole rock, J = 0.0001031 ± 0.00000029
1425-01A	1.1	8648	7.56637	231.932	5.50029	21.621	4.43027	53.3274	4.36388	14.8344	0.11484	0.00707217	4.50502	1.70118	0.144939	18.2439	0.458637	48.9303	3.43953	0.172772
1425-01B	1.2	10215.4	7.99812	444.897	5.70907	-2.76938	4.2234	123.63	4.42895	6.16273	0.08369	0.013566	8.64164	2.05662	0.0782612	18.8874	0.249707	82.2527	3.56073	0.0940602
1425-01C	1.3	9688.55	8.37377	455.19	5.92541	19.4549	4.09163	98.4628	4.49521	3.97148	0.06513	0.0138799	8.84157	1.6014	0.0760242	18.7276	0.248375	87.9921	3.53064	0.0935598
1425-01D	1.4	7929.31	7.85175	382.327	5.63858	24.8849	4.50146	101.348	4.49521	3.32276	0.06151	0.0116581	7.42628	1.96304	0.0917566	18.2062	0.273793	87.7819	3.43243	0.10314
1425-01E	1.5	10385.1	7.77946	471.295	5.70908	-6.86412	4.29118	118.894	4.42895	4.86322	0.07702	0.0143709	9.15438	1.86874	0.073201	19.0092	0.236196	86.267	3.58368	0.0889696
1425-01F	1.6	8164.7	7.99812	375.194	5.63858	9.67306	4.50146	110.278	4.42895	4.05038	0.06872	0.0114406	7.28773	2.17794	0.0933929	18.6054	0.285999	85.4904	3.50762	0.107734
1425-01G	1.7	7223.34	6.32851	322.926	5.85244	8.684	4.2234	100.471	4.49521	3.98207	0.06871	0.00984682	6.27248	2.30612	0.111322	18.7585	0.346739	83.8516	3.53646	0.130612
1425-01H	1.8	6847.85	7.77946	322.36	5.70901	11.938	4.50146	94.8098	4.42894	4.19204	0.06517	0.00982956	6.26148	2.18064	0.108941	17.428	0.315715	82.0343	3.28584	0.118942
1425-01I	1.9	5551.54	7.70779	250.699	5.50029	20.167	4.29118	88.331	4.36389	3.92455	0.06513	0.00764444	4.86955	2.61314	0.141257	17.5547	0.394484	79.2588	3.30972	0.148615
1425-01J	2	4627.97	7.35935	186.598	5.85239	14.4997	4.43027	67.8803	4.42894	3.73706	0.0607	0.00568986	3.62447	2.69878	0.195373	18.9098	0.602816	76.227	3.56495	0.22707
1425-01K	2.5	8284.47	8.07217	365.527	6.93323	7.23996	4.36016	111.499	4.30011	8.51059	0.08236	0.0111458	7.09996	2.26368	0.0972891	15.7826	0.307901	69.6283	2.97587	0.116018
1425-01L	3	6549.14	7.63675	295.366	5.7803	10.1973	4.57368	128.13	4.49522	8.77026	0.09073	0.00900647	5.73717	3.22018	0.129363	13.4096	0.279582	60.4559	2.52875	0.105373
1425-01M	3.5	3076.61	6.32851	139.099	5.99896	-8.00154	4.43027	126.229	4.3639	4.85738	0.06707	0.00424149	2.70185	6.73841	0.372453	11.9057	0.536441	53.7603	2.24533	0.202213
1425-01N	4	2723	6.48999	109.096	5.92529	1.56272	4.57368	183.82	4.36393	4.70196	0.07516	0.00332661	2.11907	12.5156	0.741854	12.5005	0.714999	49.9449	2.35742	0.269504
1425-01O	5	5748.78	6.48999	178.243	5.85239	0.5242	4.29118	302.684	4.42909	11.2134	0.09881	0.00543508	3.46218	12.6175	0.453558	13.8849	0.489297	42.9311	2.61831	0.184404
1425-01P	6	8045.7	8.07217	245.989	7.51195	3.89692	4.43027	449.995	4.42928	16.6559	0.11544	0.00750085	4.77808	13.5962	0.43623	12.9376	0.423512	39.4357	2.4398	0.159627
1425-01Q	8	9529.27	8.22192	255.438	5.78029	21.9672	4.29118	794.89	4.23882	19.4396	0.12578	0.00778895	4.9616	23.1355	0.537872	15.3631	0.38792	40.9557	2.89684	0.146176
1425-01R	10	3732.07	6.27694	116.12	5.6385	29.4247	4.36016	515.531	4.56308	7.09546	0.07928	0.00354079	2.2555	33.0168	1.62963	15.0141	0.772193	46.3397	2.83109	0.290987
Plateau age = 3.52 ± 0.04 Ma, steps 1.1-1.7 watts, 52.2% of 39Ar, MSWD = 1.1, integrated age = 3.24 ± 0.2 Ma
SMA36, whole rock, J =0.0001002 ± 0.00000050
1435-01A	1.1	23839.8	8.56037	572.035	5.63954	-8.21914	4.43319	103.77	4.21034	18.9053	0.12578	0.0174428	11.995	1.35027	0.0563799	31.8433	0.321304	76.4175	5.83193	0.117503
1435-01B	1.2	24514.9	8.64002	711.989	5.42829	-8.98072	4.28964	119.957	4.00138	7.37928	0.12286	0.0217104	14.9296	1.25446	0.0429237	31.3688	0.245155	91.1188	5.74518	0.089659
1435-01C	1.3	20219.3	8.9627	564.872	5.5682	7.90263	4.36088	112.937	4.06984	6.26687	0.07581	0.0172244	11.8448	1.48908	0.0556326	32.5236	0.32376	90.8706	5.95634	0.118393
1435-01D	1.4	17520.9	8.32406	486.435	5.93288	-25.241	4.36088	136.519	4.00139	7.30464	0.08149	0.0148327	10.2	2.09089	0.0663785	31.5973	0.389432	87.7188	5.78697	0.142421
1435-01E	1.5	13133.3	8.48116	326.661	5.4976	-13.748	4.36088	106.931	4.21034	7.38027	0.1421	0.00996075	6.84974	2.43948	0.10446	33.5348	0.580308	83.3979	6.1412	0.212187
1435-01F	1.6	13253.1	8.40238	315.455	5.56806	-12.1457	4.5065	103.573	3.93418	10.0171	0.1025	0.00961903	6.61475	2.44756	0.102517	32.608	0.584883	77.6027	5.97177	0.213879
1435-01G	1.7	10664.2	8.40238	241.191	5.71154	-5.89483	4.28964	77.2244	4.00136	10.5538	0.09426	0.00735454	5.05752	2.38753	0.136016	31.2245	0.75	70.6105	5.71879	0.274297
1435-01H	1.8	8424.12	6.5	164.543	7.04052	-9.17853	4.21951	59.7177	4.1395	10.3525	0.09328	0.00501733	3.45029	2.70713	0.220524	32.4976	1.40246	63.4614	5.95157	0.512854
1435-01I	1.9	7729.89	7.56902	133.099	5.85825	-13.7975	4.08283	55.1884	4.00136	10.9049	0.10459	0.00405852	2.79094	3.09378	0.262407	33.7131	1.50474	58.031	6.1738	0.550191
1435-01J	2	6712.68	6.38201	118.971	5.85825	-13.7777	4.36088	66.3836	4.06983	10.3313	0.08775	0.00362774	2.4947	4.16451	0.327472	30.6331	1.52723	54.2597	5.61063	0.558584
1435-01K	2.5	11819.5	7.86448	221.699	5.78452	-5.99374	4.5065	87.2282	4.21034	20.609	0.12641	0.00676017	4.64878	2.93744	0.161174	25.6519	0.692226	48.1021	4.69947	0.253309
1435-01L	3	8425.65	7.93977	141.613	7.37465	-4.98489	4.43319	90.0147	4.00137	18.0866	0.12549	0.00431814	2.96947	4.74697	0.325018	21.5213	1.15453	36.1446	3.94354	0.422656
1435-01M	3.5	2164.55	6.26817	36.0341	5.56799	-6.49816	4.5065	77.7856	4.00136	4.84026	0.06925	0.00109877	0.755597	16.1258	2.62621	20.5146	3.24043	34.0258	3.75927	1.18639
1435-01N	4	4537.68	6.15873	81.0196	5.78449	-15.6174	4.28964	132.442	4.06985	9.76862	0.09498	0.0024705	1.69889	12.2153	0.949474	20.4201	1.5069	36.3625	3.74198	0.551713
1435-01O	5	39240	10.2216	434.187	5.49765	15.736	4.15055	662.162	4.14034	95.7778	0.4792	0.0132395	9.10445	11.3995	0.160979	24.9177	0.461564	27.5034	4.56513	0.168914
1435-01P	6	12748.5	8.64002	123.044	5.63934	-11.2259	4.36088	294.896	4.2824	31.335	0.14963	0.00375195	2.58011	17.9198	0.861537	28.2227	1.35534	27.127	5.16979	0.495836
1435-01Q	8	8571.6	6.38201	75.6746	5.49753	-0.73191	4.28964	382.981	4.0701	22.4126	0.12713	0.00230752	1.58682	37.8516	2.77907	26.2167	2.00073	22.9307	4.80281	0.732091
1435-01R	10	3023.89	7.56902	20.4362	5.56799	-12.0864	4.43319	244.385	4.28235	8.29726	0.08907	0.000623154	0.428526	89.4666	24.4262	30.0775	8.51959	19.8681	5.50904	3.11622
Weighted mean age* = 5.84 ± 0.09 Ma, steps 1.1-1.7 watts, 67.5% of 39Ar, MSWD = 3.2, integrated age = 5.7 ± 0.2 Ma
SMA45, whole rock, J =0.0001002 ± 0.00000050
1436-01A	1.1	11127.5	7.4411	245.989	5.36586	-6.90368	4.64205	78.465	4.14168	21.7364	0.11691	0.00750087	10.83	2.38854	0.136418	18.9258	0.437962	41.8324	3.4684	0.160373
1436-01B	1.2	13040.8	7.98123	372.064	5.70903	-18.0109	4.36397	103.849	4.21018	17.9677	0.11539	0.0113452	16.3806	2.09068	0.0906268	20.6928	0.331737	59.0346	3.7919	0.121454
1436-01C	1.3	10865.9	7.82432	325.4	7.09644	-10.3951	4.50081	99.664	4.27983	14.4586	0.10482	0.00992229	14.3261	2.29486	0.110527	20.1951	0.451819	60.4714	3.70079	0.165426
1436-01D	1.4	8884.47	7.59276	270.797	5.7803	3.36282	4.29734	51.0628	4.07442	11.7375	0.09557	0.00825732	11.9222	1.41327	0.116733	19.9073	0.438908	60.6842	3.6481	0.160704
1436-01E	1.5	9103.32	7.36614	281.616	7.59623	-29.1478	4.50081	65.0248	4.21017	12.1159	0.09475	0.00858723	12.3985	1.73107	0.121419	19.5264	0.537132	60.4082	3.57837	0.196675
1436-01F	1.6	6112.57	6.02163	171.775	5.85239	-29.85	4.5709	53.8296	4.21016	8.48772	0.08167	0.00523789	7.56264	2.35009	0.200489	20.8972	0.727366	58.7179	3.82931	0.266294
1436-01G	1.7	4899.57	7.82432	142.904	6.14847	-6.36958	4.5709	44.1803	4.21016	6.76987	0.0785	0.00435753	6.29155	2.3192	0.24249	20.2109	0.887218	58.9416	3.70367	0.324839
1436-01H	1.8	3571.16	5.64358	108.311	5.50026	-11.7995	4.36397	30.0902	4.14167	5.06854	0.07173	0.00330269	4.76853	2.08468	0.305845	19.058	0.989791	57.7984	3.49261	0.362436
1436-01I	1.9	2501.72	5.85235	62.7293	5.63849	-5.39041	4.64205	43.0282	4.07441	3.47898	0.06241	0.00191278	2.76174	5.14871	0.672218	23.4924	2.13754	58.8562	4.30432	0.782368
1436-01J	2	1894.82	5.85235	30.0234	5.63849	-11.6809	4.29734	33.6447	4.21016	2.87422	0.06054	0.000915495	1.32182	8.41399	1.89882	34.8227	6.58509	55.0835	6.37666	2.4075
1436-01K	2.5	2577.89	6.02163	83.9504	5.63849	-13.4909	4.5709	97.3009	3.94385	4.10007	0.06073	0.00255987	3.69603	8.70502	0.682884	16.4077	1.12825	53.3384	3.00731	0.413245
1436-01L	3	1409.65	7.82432	78.9233	5.36582	-23.5595	4.78729	131.418	4.07444	2.72503	0.05611	0.00240658	3.4747	12.5099	0.934784	7.93544	0.590607	44.3069	1.45507	0.216506
1436-01M	3.5	664.41	7.21803	39.8591	5.17193	-4.98489	4.43182	124.043	4.21019	1.6844	0.05083	0.00121541	1.75485	23.3875	3.13675	4.77234	0.754548	28.4712	0.875215	0.276692
1436-01N	4	547.21	7.00071	31.6329	5.63849	-9.28733	4.36397	178.356	4.07447	1.66915	0.05168	0.000964572	1.39268	42.3852	7.61685	2.82943	0.745311	16.1854	0.518948	0.273358
1436-01O	5	1107.49	7.14493	25.3937	5.50025	-16.6855	4.29734	464.252	4.21058	3.24634	0.06238	0.000774323	1.11799	137.475	29.803	9.87422	2.38083	21.8493	1.8104	0.872602
Plateau age = 3.71 ± 0.08 Ma, steps 1.1-1.9 watts, 76.5% of 39Ar, MSWD = 1.3, integrated age = 3.2 ± 0.5 Ma
SMA-7, sanidine and plagioclase, J =0.0000417 ± 0.00000008
617-02A	4	5216.85	5.786	183.343	0.27	2.541	0.065	5.996	0.19	0.276	0.072193	4.05195e-16	100	0.0641022	0.0020451	28.0082	0.130077	98.4311	2.13627	0.0198312
617-03A	4	5866.6	5.685	208.631	0.32	2.634	0.077	2.513	0.184	0.15	0.0727328	4.61082e-16	100	0.0236068	0.0017341	27.9062	0.1174	99.2408	2.1285	0.0178986
617-04A	4	7226.64	6.327	245.892	0.4	3.36	0.065	3.853	0.174	0.843	0.0708645	5.43322e-16	100	0.0307141	0.0013939	28.3678	0.103227	96.5227	2.16369	0.0157376
617-05A	4	6467.06	5.925	228.677	0.35	3.272	0.061	4.524	0.164	0.298	0.0689928	5.05285e-16	100	0.0387785	0.0014138	27.8927	0.10485	98.6282	2.12747	0.0159854
617-06A	4	8798.46	7.037	287.443	0.34	3.72	0.067	2.317	0.168	0.203	0.0687505	6.35175e-16	100	0.0157963	0.0011478	30.3994	0.0860152	99.3132	2.31854	0.0131124
617-07A	4	7581.85	6.359	258.061	0.4	3.616	0.081	7.251	0.186	0.7	0.071512	5.70211e-16	100	0.0550728	0.001419	28.5722	0.0992613	97.2488	2.17927	0.0151328
617-08A	4	6191.94	5.166	228.802	0.33	3.284	0.067	5.792	0.189	0.144	0.0693165	5.0566e-16	100	0.0496188	0.0016295	26.8763	0.102605	99.3106	2.04999	0.0156436
617-10A	4	8281.79	5.593	283.755	0.43	3.94	0.066	7.783	0.173	0.729	0.0704549	6.27026e-16	100	0.0537597	0.0012012	28.4222	0.090331	97.3798	2.16783	0.0137714
Note: All data corrected for blanks, radioactive decay, nucleogenic interferences, mass discrimination, and detector intercalibration. Ages calculated with decay constants in Min et al. (2000), atmospheric 40Ar/36Ar= 298.56 +/- 0.31 (Lee et al, 2006) and age of 28.201 +/- 0.046 for Fish Canyon sanidine (Kuiper et al., 2008). Argon isotope data for all whole rock samples acquired by simultaneous c…
